# Supplementary material
Source: PubMed Central journal article supplement (PMC3078754)
Supplement: NIHMS266350-supplement-1.pdf [file NIHMS266350-supplement-1.pdf]

## Supplementary Tables

**Supplementary Table 1.** Data collection and refinement statistics for selenomethionine labeled protein

|                                                      | Dbp5-CTD <sup>L327V</sup> /<br>IP <sub>6</sub> /Gle1 <sup>H337R</sup> | Dbp5-CTD <sup>L327V</sup> /<br>IP <sub>6</sub> /Gle1 <sup>WT</sup> |                          |                  |
|------------------------------------------------------|-----------------------------------------------------------------------|--------------------------------------------------------------------|--------------------------|------------------|
| <b>Data collection</b>                               |                                                                       |                                                                    |                          |                  |
| Space group                                          | P6 <sub>1</sub> 22                                                    | P6 <sub>1</sub> 22                                                 |                          |                  |
| Cell dimensions                                      |                                                                       |                                                                    |                          |                  |
| <i>a</i> , <i>b</i> , <i>c</i> (Å)                   | 110.4, 110.4, 201.5                                                   | 110.9, 110.9, 201.9                                                |                          |                  |
| $\alpha$ , $\beta$ , $\gamma$ (°)                    | 90.0, 90.0, 120                                                       | 90.0, 90.0, 120                                                    |                          |                  |
|                                                      | <i>Peak</i>                                                           | <i>Inflection</i>                                                  | <i>Remote</i>            | <i>Remote</i>    |
| Wavelength                                           | 0.9796                                                                | 0.9798                                                             | 1.020                    | 1.116            |
| Resolution (Å)                                       | 50-2.7 (2.8-2.7)                                                      | 50-2.8 (2.9-2.8)                                                   | 50-2.6 (2.7-2.6)         | 50-2.5 (2.6-2.5) |
| <i>R</i> <sub>sym</sub> or <i>R</i> <sub>merge</sub> | 12.9 (74.6)                                                           | 12.5 (63.1)                                                        | 10.0 (69.0)              | 9.4 (47.8)       |
| <i>I</i> / $\sigma$ <i>I</i>                         | 21.7 (3.8)                                                            | 24.9 (5.3)                                                         | 18.9 (2.8)               | 20.1 (2.5)       |
| Completeness (%)                                     | 100 (100)                                                             | 100 (100)                                                          | 99.9 (100)               | 99.3 (94.0)      |
| Redundancy                                           | 15.5 (15.2)                                                           | 16.7 (16.8)                                                        | 7.5 (7.4)                | 7.5 (4.1)        |
| <b>Refinement</b>                                    |                                                                       |                                                                    |                          |                  |
| Resolution (Å)                                       | 48-2.6                                                                |                                                                    | 48-2.5                   |                  |
| No. reflections                                      | 39,606                                                                |                                                                    | 25,940                   |                  |
| <i>R</i> <sub>work</sub> / <i>R</i> <sub>free</sub>  | 18.7 / 21.3 <sup>a</sup>                                              |                                                                    | 20.2 / 23.8 <sup>a</sup> |                  |
| No. atoms                                            |                                                                       |                                                                    |                          |                  |
| Protein                                              | 3808                                                                  |                                                                    | 3807                     |                  |
| Ligand/ion                                           | 59                                                                    |                                                                    | 59                       |                  |
| Water                                                | 57                                                                    |                                                                    | 80                       |                  |
| B-factors                                            |                                                                       |                                                                    |                          |                  |
| Protein                                              | 58.2                                                                  |                                                                    | 61.2                     |                  |
| Ligand/ion                                           | 65.7                                                                  |                                                                    | 65.0                     |                  |
| Water                                                | 49.5                                                                  |                                                                    | 50.1                     |                  |
| R.m.s deviations                                     |                                                                       |                                                                    |                          |                  |
| Bond lengths (Å)                                     | 0.003                                                                 |                                                                    | 0.004                    |                  |
| Bond angles (°)                                      | 0.677                                                                 |                                                                    | 0.708                    |                  |

\*Highest resolution shell is shown in parenthesis.

<sup>a</sup> *R*<sub>free</sub> is calculated using 5% of the data omitted from refinement

**Supplementary Table 2.** Data collection and refinement statistics for native protein

|                                                      | $\Delta 90\text{Dbp5}^{\text{L327V}}/$<br>IP <sub>6</sub> /Gle1 <sup>H337R</sup> /<br>ADP | $\Delta 90\text{Dbp5}^{\text{L327V}}/$<br>RNA/<br>ADP•BeF <sub>3</sub> | $\Delta 90\text{Dbp5}/$<br>RNA/<br>ADP•BeF <sub>3</sub> | $\Delta 90\text{Dbp5}^{\text{L327V}}/$<br>IP <sub>6</sub> /Gle1 <sup>H337R</sup> /<br>ADP/Nup159 |
|------------------------------------------------------|-------------------------------------------------------------------------------------------|------------------------------------------------------------------------|---------------------------------------------------------|--------------------------------------------------------------------------------------------------|
| <b>Data collection</b>                               |                                                                                           |                                                                        |                                                         |                                                                                                  |
| Space group                                          | I2 <sub>1</sub> 3                                                                         | P2 <sub>1</sub> 2 <sub>1</sub> 2 <sub>1</sub>                          | P2 <sub>1</sub> 2 <sub>1</sub> 2 <sub>1</sub>           | C2                                                                                               |
| Cell dimensions                                      |                                                                                           |                                                                        |                                                         |                                                                                                  |
| <i>a</i> , <i>b</i> , <i>c</i> (Å)                   | 207.0, 207.0, 207.0                                                                       | 42.31, 90.81, 105.1                                                    | 42.14, 92.21, 104.5                                     | 186.9, 67.98, 132.4                                                                              |
| $\alpha$ , $\beta$ , $\gamma$ (°)                    | 90.0, 90.0, 90.0                                                                          | 90.0, 90.0, 90.0                                                       | 90.0, 90.0, 90.0                                        | 90.0, 128, 90.0                                                                                  |
| Resolution (Å)                                       | 104-4.0 (4.2-4.0)                                                                         | 50-1.5 (1.6-1.5)                                                       | 50-1.4 (1.5-1.4)                                        | 50-2.9 (3.0-2.9)                                                                                 |
| <i>R</i> <sub>sym</sub> or <i>R</i> <sub>merge</sub> | 9.1 (61.7)                                                                                | 6.2 (32.8)                                                             | 4.0 (43.5)                                              | 10.1 (66.8)                                                                                      |
| <i>I</i> / $\sigma$ <i>I</i>                         | 12.7 (3.2)                                                                                | 25.1 (3.5)                                                             | 26.2 (2.3)                                              | 12.6 (2.0)                                                                                       |
| Completeness (%)                                     | 100 (100)                                                                                 | 98.8 (97.7)                                                            | 94.0 (67.0)                                             | 99.8 (99.7)                                                                                      |
| Redundancy                                           | 7.0 (7.2)                                                                                 | 6.9 (3.9)                                                              | 3.6 (2.3)                                               | 3.7 (3.5)                                                                                        |
| <b>Refinement</b>                                    |                                                                                           |                                                                        |                                                         |                                                                                                  |
| Resolution (Å)                                       | 103-4.0                                                                                   | 34-1.5                                                                 | 45-1.4                                                  | 48-2.9                                                                                           |
| No. reflections                                      | 12,612                                                                                    | 64,601                                                                 | 75, 947                                                 | 29,959                                                                                           |
| <i>R</i> <sub>work</sub> / <i>R</i> <sub>free</sub>  | 21.4 / 23.9 <sup>b</sup>                                                                  | 16.5 / 18.9 <sup>a</sup>                                               | 16.0 / 18.0 <sup>a</sup>                                | 22.9 / 26.2 <sup>a</sup>                                                                         |
| No. atoms                                            |                                                                                           |                                                                        |                                                         |                                                                                                  |
| Protein                                              | 5442                                                                                      | 3252                                                                   | 3318                                                    | 8259                                                                                             |
| Ligand/ion                                           | 135                                                                                       | 160                                                                    | 162                                                     | 64                                                                                               |
| Water                                                | 0                                                                                         | 532                                                                    | 493                                                     | 0                                                                                                |
| B-factors                                            |                                                                                           |                                                                        |                                                         |                                                                                                  |
| Protein                                              | 158                                                                                       | 15.6                                                                   | 14.5                                                    | 61.1                                                                                             |
| Ligand/ion                                           | 205                                                                                       | 20.6                                                                   | 19.5                                                    | 82.9                                                                                             |
| Water                                                | -                                                                                         | 28.8                                                                   | 27.8                                                    | -                                                                                                |
| R.m.s deviations                                     |                                                                                           |                                                                        |                                                         |                                                                                                  |
| Bond lengths (Å)                                     | 0.007                                                                                     | 0.013                                                                  | 0.016                                                   | 0.002                                                                                            |
| Bond angles (°)                                      | 0.556                                                                                     | 1.503                                                                  | 1.516                                                   | 0.532                                                                                            |

\*Highest resolution shell is shown in parenthesis.

<sup>a</sup> *R*<sub>free</sub> is calculated using 5% of the data omitted from refinement

<sup>b</sup> *R*<sub>free</sub> is calculated using 10% of the data omitted from refinement

**Supplementary Table 3.** Binding and release values for MANT nucleotides and RNA.

|                                                        | <b>DQAD mutant</b>                | <b>WT</b>                      |
|--------------------------------------------------------|-----------------------------------|--------------------------------|
| <b>MANT-ADP release</b>                                | $k_{\text{off}}$                  | $k_{\text{off}}$               |
| Dbp5                                                   | 0.29 +/- 0.02 s <sup>-1</sup>     | n.d.                           |
| Dbp5 + Gle1 + IP <sub>6</sub>                          | 0.26 +/- 0.03 s <sup>-1</sup>     | n.d.                           |
| Dbp5 + RNA                                             | 0.26 +/- 0.02 s <sup>-1</sup>     | n.d.                           |
| Dbp5 + RNA + Gle1 + IP <sub>6</sub>                    | 0.23 +/- 0.02 s <sup>-1</sup>     | n.d.                           |
| <b>MANT-ADP binding</b>                                | Kd                                | Kd                             |
| Dbp5                                                   | 150 +/- 22 nM                     | n.d.                           |
| Dbp5 + Gle1 + IP <sub>6</sub>                          | 142 +/- 34 nM                     | n.d.                           |
| <b>RNA binding (29 nt ssRNA)</b>                       | Kd                                | Kd                             |
| Dbp5 + ATP                                             | 70 +/- 30 nM                      | n.d.                           |
| Dbp5 + ATP + Gle1 + IP <sub>6</sub>                    | 67 +/- 27 nM                      | 280 +/- 27 nM                  |
| Δ90Dbp5 + ATP                                          | n.d.                              | 207 +/- 15 nM                  |
| Δ90Dbp5 + ATP + Gle1 + IP <sub>6</sub>                 | n.d.                              | 384 +/- 90 nM                  |
| <b>RNA release (29 nt ssRNA)</b>                       | $k_{\text{off}}$                  | $k_{\text{off}}$               |
| Dbp5 + ATP                                             | 0.0039 +/- 0.0003 s <sup>-1</sup> | n.d.                           |
| Dbp5 + ATP + Gle1 + IP <sub>6</sub>                    | 0.033 +/- 0.009 s <sup>-1</sup>   | 0.28 +/- 0.014 s <sup>-1</sup> |
| Dbp5 + ATP + Gle1 <sup>VAI→DDD</sup> + IP <sub>6</sub> | 0.0042 +/- 0.012 s <sup>-1</sup>  | n.d.                           |
| <b>RNA release (25 nt ssRNA)</b>                       | $k_{\text{off}}$                  | $k_{\text{off}}$               |
| eIF4A + ATP                                            | 0.0186 +/- 0.003 s <sup>-1</sup>  | n.d.                           |
| eIF4A + ATP + eIF4G                                    | 0.091 +/- 0.03 s <sup>-1</sup>    | n.d.                           |

n.d. = not determined

**Supplementary Table 4. Yeast Strain List**

| Strain  | Genotype                                                                                                                                                   | Source or Reference |
|---------|------------------------------------------------------------------------------------------------------------------------------------------------------------|---------------------|
| KWY1561 | [ <i>MATa</i> , <i>ura3-52</i> , <i>lys2-801</i> , <i>ade2-101</i> , <i>trp1-1</i> , <i>his3-200</i> ,<br><i>leu2-1</i> , <i>gle1::KanMX6</i> , (pKW1718)] | <sup>1</sup>        |

**Supplementary Table 5. Plasmid List**

| Plasmid | Description                                  | Source or Reference |
|---------|----------------------------------------------|---------------------|
| pKW1818 | <i>GLE1/CEN/LEU2</i>                         | <sup>1</sup>        |
| pKW2571 | <i>GLE1/CEN/LEU2</i> (V513D/A516D/I520D)     | This study          |
| pKW1718 | <i>GLE1/CEN/URA3</i>                         | This study          |
| pKW1329 | pSV271-DBP5                                  | <sup>1</sup>        |
| pKW1459 | pSV271-NUP159 (2-387)                        | <sup>2</sup>        |
| pKW2446 | pSV271-DBP5 (E240Q)                          | This study          |
| pKW2554 | pSV271-DBP5 (K477A, K481A)                   | This study          |
| pKW2496 | pSV271- <i>DBP5-I<sup>D</sup></i> (267-482)  | This study          |
| pKW2499 | pSV271- <i>DBP5-I<sup>D</sup></i> (91-482)   | This study          |
| pKW1716 | pSV272-GLE1 (244-538)                        | <sup>1</sup>        |
| pKW2570 | pSV272-GLE1 (244-538)<br>(V513D/A516D/I520D) | This study          |
| pKW2456 | pSV272- <i>GLE1-22<sup>D</sup></i> (244-538) | This study          |
| pKW2625 | pSV271-eIF4A (E172Q)                         | This study          |
| pKW2613 | pSV272-eIF4G (572-952)                       | This study          |



three direct IP<sub>6</sub> contacts and one water-mediated contact in our structure **(b)**, accounting for 4 of the 13 side chain-mediated polar contacts (~30%) with IP<sub>6</sub>. These residues likely define the IP<sub>6</sub> binding core, whereas the other more variable residues may serve to tune IP<sub>6</sub> sensitivity in various species. In species where residue K333 has been changed to a residue of the opposite charge (K to E), there is a corresponding mutation of residue 334 to a lysine that may be capable of binding IP<sub>6</sub>. Alignments made using ClustalW<sup>4</sup>. **e**, Dbp5<sup>KK->AA+L327V</sup> does not form a stable complex with Gle1<sup>H337R</sup> by gel filtration. Elution profiles of Dbp5<sup>L327V</sup> or Dbp5<sup>KK->AA+L327V</sup> after mixing with Gle1<sup>H337R</sup> from a Superdex 200 gel filtration column in the presence of IP<sub>6</sub>. The peak at ~16.5mL corresponds to cleaved His<sub>6</sub>-MBP tag present in the Gle1 protein preparation.

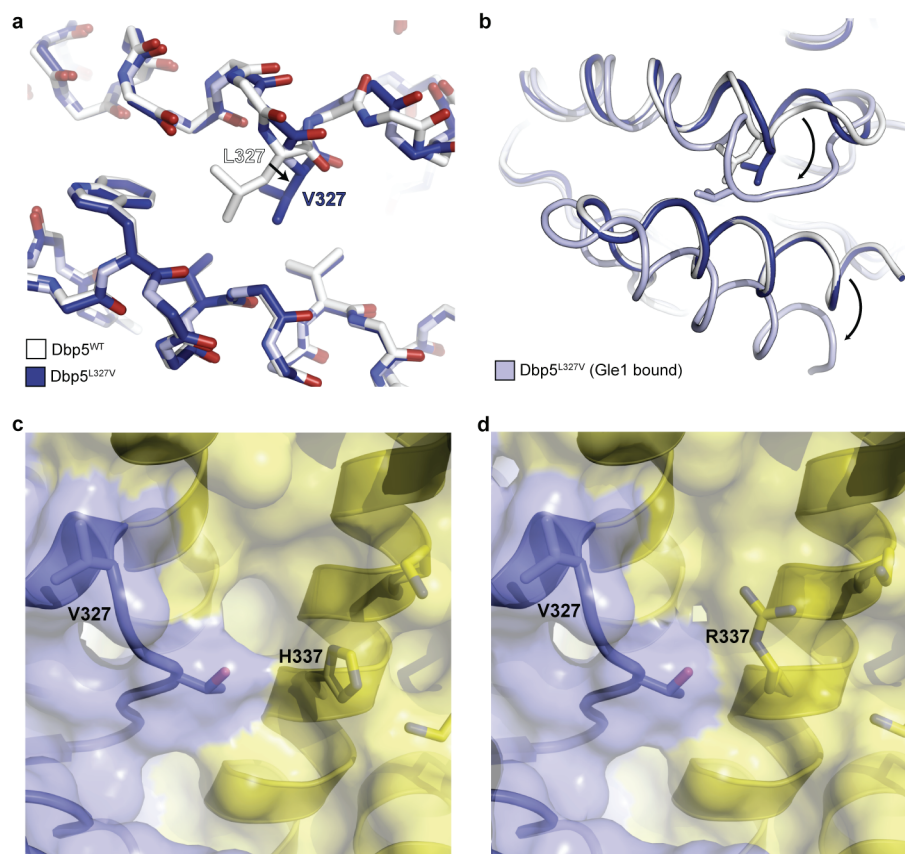

**Supplementary Figure 2. Structural affects of Dbp5<sup>L327V</sup> and Gle1<sup>H337R</sup> gain-of-function mutations.** **a**, A structural superposition of  $\Delta 90$ Dbp5-RNA structures in the presence and absence of the L327V mutation (see colour key). Change in side chain packing due to the gain-of-function mutation disrupts the structure of an  $\alpha$ -helix in Dbp5. **b**, Superposing the structures in **(a)** onto the  $\Delta 90$ Dbp5-Gle1 structure (see colour key) reveals that the same alpha helix must bend to accommodate Gle1 binding. Thus, the disruption caused by V327 may lower the free energy for such a conformational change and stabilize the protein-protein complex. **c**, H337 lies within the IP<sub>6</sub> binding pocket at the Dbp5-Gle1 interface, but does not make any direct contacts with IP<sub>6</sub> (Supplementary Fig. 1a). Protein subunits coloured as in Figure 1. **d**, The H337R

mutation appears to contribute additional polar and van der Waals contacts to the Gle1-Dbp5 interface. The close vicinity of the V327 and R337 mutations at the protein-protein interface likely explains their cooperative effect in stabilizing the Dbp5-Gle1 complex (Supplementary Fig. 1e). Protein subunits coloured as in Figure 1.

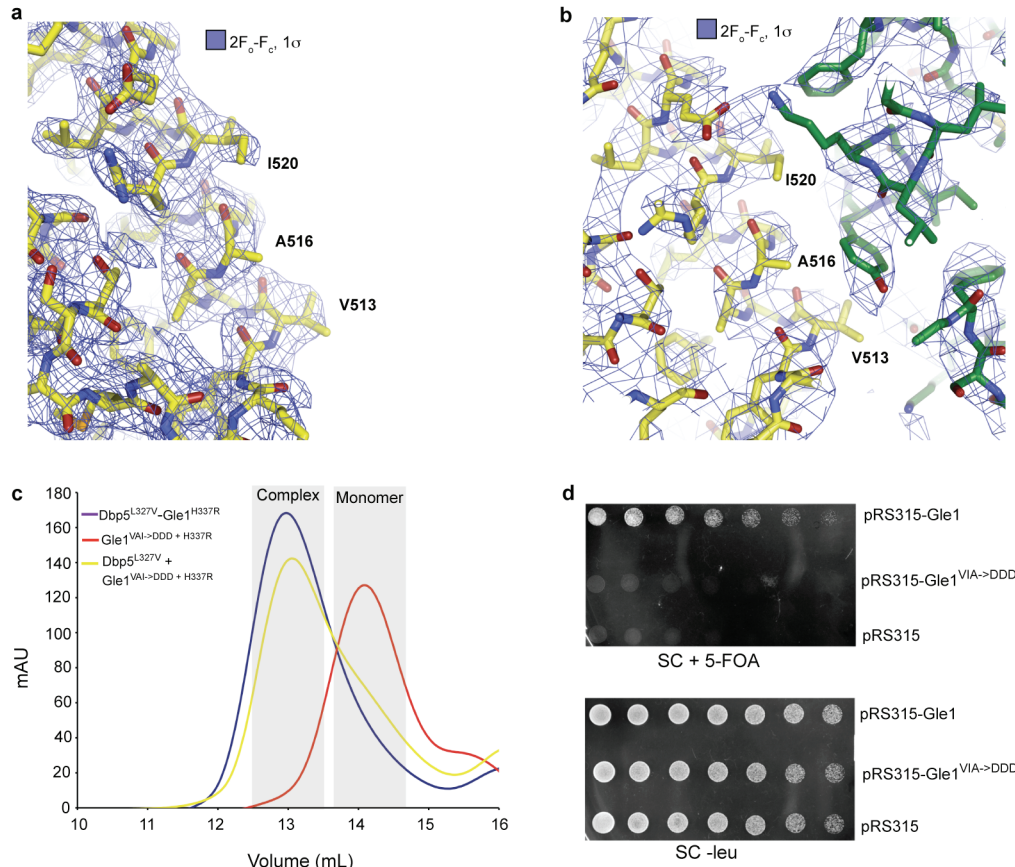

**Supplementary Figure 3. Mutational analysis of the Gle1-Dbp5-NTD contact.** **a**, Final refined  $2F_o-F_c$  electron density maps contoured at  $1\sigma$  for the Gle1<sup>WT</sup>-Dbp5<sup>L327V</sup> structure highlighting the solvent exposed hydrophobic residues V513, A516, and I520 on the C-terminal helix in Gle1. **b**, Final refined  $2F_o-F_c$  electron density maps contoured at  $1\sigma$  for the Gle1<sup>H337R</sup>- $\Delta$ 90Dbp5 structure highlighting the Gle1-Dbp5-NTD interface. **c**, Dbp5<sup>L327V</sup> and Gle1<sup>VAI->DDD+H337R</sup> form a stable complex. Elution profiles of Gle1<sup>VAI->DDD+H337R</sup> or Gle1<sup>H337R</sup> in complex with Dbp5<sup>L327V</sup> compared to Gle1<sup>VAI->DDD+H337R</sup> alone. Elution profiles from a Superdex 200 gel filtration column in the presence of 30 mM HEPES (pH 7.5), 150 mM NaCl, 1 mM DTT, 0.25 mM IP<sub>6</sub>, and 5% glycerol are shown. **d**, Dbp5-NTD/Gle1 contact is essential *in vivo*. Growth of KWY1561 carrying the indicated plasmids after one day of growth on SC + 5-FOA at 30°C.

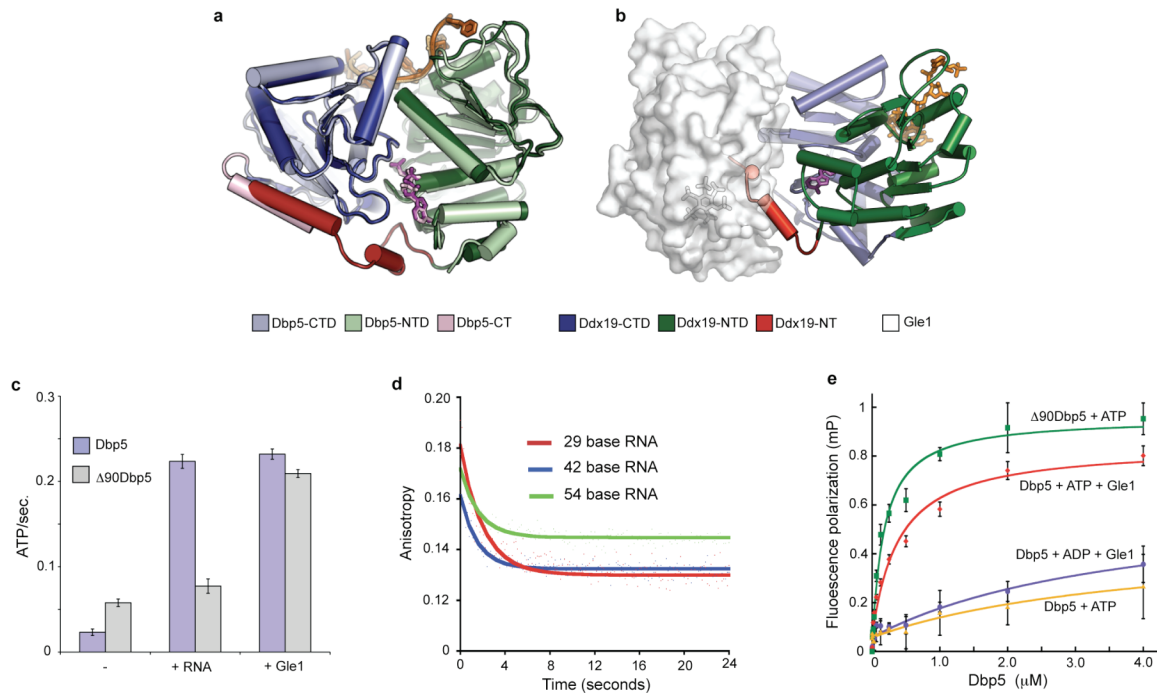

**Supplementary Figure 4. Gle1 binding relieves Dbp5 auto-inhibition.** **a**, Structural superposition of the RNA-Δ90Dbp5 complex bound to ADP•BeF<sub>3</sub> with the RNA-Ddx19 complex bound to AMP-PNP (PDB ID: 3G0H)<sup>5</sup> reveals nearly identical conformations of the two proteins. Note that the C-terminal helix required for IP<sub>6</sub> binding (pink) packs along the same surface as the N-terminal extension (red) present in the Ddx19 structure. **b**, Superposition of the RNA-Ddx19 complex with the Gle1-Δ90Dbp5 complex shows that the Ddx19 N-terminus (red) would clash with Gle1. **c**, Stimulation of Δ90Dbp5 ATPase activity by Gle1 suggests that Gle1 functions to relieve Dbp5 auto-inhibition. Error bars represent standard deviation (n=3). **d**, Dbp5 undergoes single turnover binding reactions with RNA. RNA release from Dbp5 was monitored by fluorescent polarization. Dbp5 (0.5μM), FITC-RNA (20nM), ATP (1mM), and Gle1 (1.0μM) were pre-mixed to allow steady state complex formation and then poly-A RNA (0.5mg/mL) was added by mixing in a stopped-flow chamber. Release measurements were made for ssRNA of lengths 29 ( $t_{1/2} = 0.41 \pm 0.02 \text{ sec}^{-1}$ ), 42 ( $t_{1/2} = 0.46 \pm 0.02 \text{ sec}^{-1}$ ), and 54 ( $t_{1/2} = 0.47 \pm 0.06 \text{ sec}^{-1}$ ) bases.  $t_{1/2}$  values are an average of three independent experiments  $\pm$  s.d. (n=3). Data were fit to a single exponential decay curve using KaleidaGraph (Synergy Software). Representative curves are shown for each condition.  $t_{1/2}$  values correspond to a  $k_{\text{off}}$  of 0.28 to 0.33 s<sup>-1</sup> which fits with a single turnover event given the measured ATPase rates under the same conditions (0.32  $\pm$  0.02 ATP sec<sup>-1</sup>). **e**, RNA binding monitored by fluorescent polarization in the presence of IP<sub>6</sub> and ATP with Dbp5. Measured apparent  $K_d$  for Dbp5 + Gle1 was 280  $\pm$  27 nM, while Δ90Dbp5 was 207  $\pm$  15 nM (average  $\pm$  s.d. , n=3).



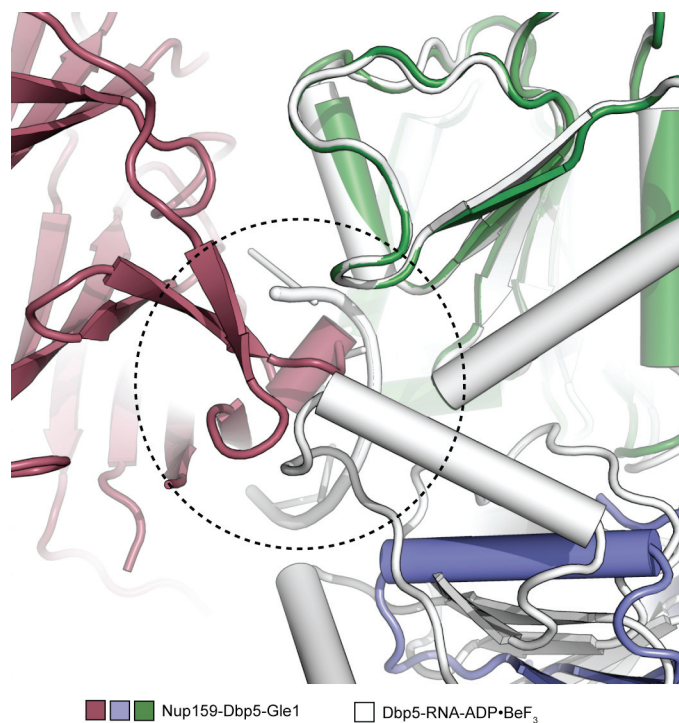

**Supplementary Figure 5. Nup159 binding occludes the Dbp5 RNA binding site.** A structural superposition of the Dbp5-RNA and Nup159-Dbp5-Gle1 structures shows that Nup159 sterically clashes (see dashed circle) with both the C-terminal RecA-like domain and the bound RNA in the closed ADP•BeF<sub>3</sub> bound state of Dbp5 (see colour key).

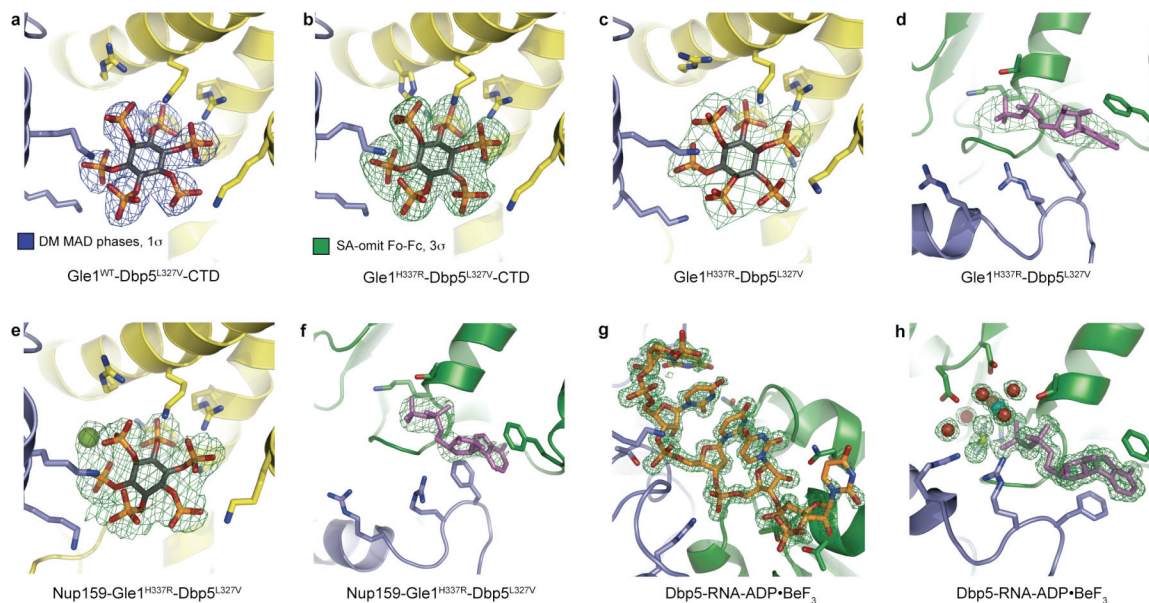

**Supplementary Figure 6. Clear electron density is present for all ligands in the various structures.** Gle1 is depicted in yellow, Dbp5-NTD in green and Dbp5-CTD in blue. **a**, Density-modified (DM), experimentally phased electron density maps shown at a contour level of 1 $\sigma$  for

IP<sub>6</sub> in the Gle1<sup>H337R</sup>-Dbp5<sup>L327V</sup>-CTD structure. The remaining panels show simulated annealing (SA) F<sub>o</sub>-F<sub>c</sub> omit maps contoured at 3σ calculated for all ligands. **b**, IP<sub>6</sub> in the Gle1<sup>WT</sup>-Dbp5<sup>L327V</sup>-CTD structure. **c**, IP<sub>6</sub> in the Gle1<sup>H337R</sup>-Δ90Dbp5<sup>L327V</sup> structure. A B-factor sharpening value of -100 Å<sup>2</sup> was applied in order to more strongly weight high resolution data and improve the 4 Å electron density maps. **d**, ADP in the Gle1<sup>H337R</sup>-Δ90Dbp5<sup>L327V</sup> structure. A B-factor sharpening value of -100 Å<sup>2</sup> was applied as in panel (c). **e**, IP<sub>6</sub> in the Nup159-Gle1<sup>H337R</sup>-Δ90Dbp5<sup>L327V</sup> structure. **f**, ADP in the Nup159-Gle1<sup>H337R</sup>-Δ90Dbp5<sup>L327V</sup> structure. **g**, RNA in the RNA-Δ90Dbp5 structure. **h**, ADP•BeF<sub>3</sub>•Mg<sup>2+</sup> and bound water molecules in the RNA-Δ90Dbp5 structure.

### Supplementary References:

1. Weirich, C. S. *et al.* Activation of the DExD/H-box protein Dbp5 by the nuclear-pore protein Gle1 and its coactivator InsP6 is required for mRNA export. *Nat. Cell Biol.* **8**, 668-676 (2006).
2. Weirich, C. S., Erzberger, J. P., Berger, J. M. & Weis, K. The N-terminal domain of Nup159 forms a beta-propeller that functions in mRNA export by tethering the helicase Dbp5 to the nuclear pore. *Mol. Cell* **16**, 749-760 (2004).
3. Alcazar-Roman, A. R., Bolger, T. A. & Wente, S. R. Control of mRNA export and translation termination by inositol hexakisphosphate requires specific interaction with Gle1. *J. Biol. Chem.* (2010).
4. Larkin, M. A. *et al.* Clustal W and Clustal X version 2.0. *Bioinformatics* **23**, 2947-2948 (2007).
5. Collins, R. *et al.* The DEXD/H-box RNA helicase DDX19 is regulated by an {alpha}-helical switch. *J. Biol. Chem.* **284**, 10296-10300 (2009).
